# Supplementary material for: Daily 1 km seamless Antarctic sea ice albedo product from 2012 to 2021 based on VIIRS data
Source: Copernicus journal article supplement (doi:10.5194/essd-2025-79), 2025-05-09
Supplement: Supplementary file [file essd-2025-79-RC1-supplement.pdf]

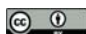

## Daily 1 km seamless Antarctic sea ice albedo product from 2012 to 2021 based on VIIRS data

Chao Ma<sup>1</sup>, Weifeng Hao<sup>1,2</sup>, Qing Cheng<sup>3</sup>, Fan Ye<sup>3</sup>, Ying Qu<sup>4</sup>, Jiabo Yin<sup>5</sup>, Fang Xu<sup>6</sup>,  
Haojian Wu<sup>1</sup>, Fei Li<sup>1,2,7</sup>

- 5 <sup>1</sup>Chinese Antarctic Center of Surveying and Mapping, Wuhan University, Wuhan 430079, China  
<sup>2</sup>The Key Laboratory of Polar Environment Monitoring and Public Governance (Wuhan University), Ministry of  
Education, Wuhan 430079, China  
<sup>3</sup>School of Computer Science, China University of Geoscience, Wuhan 430074, China  
<sup>4</sup>School of Geographical Sciences, Northeast Normal University, Changchun 130024, China  
10 <sup>5</sup>State Key Laboratory of Water Resources and Hydropower Engineering Science, Wuhan University, Wuhan  
430079, China  
<sup>6</sup>School of Artificial Intelligence, Wuhan University, Wuhan 430079, China  
<sup>7</sup>The Department of Earth and Space Sciences, Southern University of Science and Technology, Shenzhen,  
518055, China  
15 *Correspondence to:* Weifeng Hao (haoxf@whu.edu.cn) and Fei Li (fli@whu.edu.cn)

**Abstract.** Sea ice albedo is a critical parameter for quantifying the energy budget in the Antarctic region. High spatiotemporal resolution sea ice albedo product is essential for Antarctic climate and environmental research. In this study, based on Visible Infrared Imaging Radiometer Suite (VIIRS) reflectance data, we use the Multiband Reflectance Iteration (MBRI) algorithm to calculate sea ice albedo. This algorithm fully utilizes multi-band  
20 observations from single-angle/date observed information to correct the anisotropy of the sea ice surface. Additionally, spatiotemporal information is utilized to reconstruct albedo under cloudy-sky conditions, while correcting for cloud radiative forcing effects. A new daily seamless Antarctic sea ice albedo product with a 1 km resolution is then generated for the period 2012 to 2021. Monte Carlo simulations show that the average retrieval uncertainty of this product is 0.022, with higher uncertainty in backward observations. The MBRI albedo product was

- 25 validated using in situ measurements from Automatic Weather Stations (AWS). The results show that the bias is 0.02, with a root mean square error (RMSE) of 0.071. After upscaling to 25 km resolution and applying a 5-day temporal aggregation, the RMSE decreased to below 0.055. Compared to existing albedo products, the MBRI product exhibits improved spatial continuity due to the reconstruction of cloudy-sky pixels. Statistical analysis shows that albedo under cloudy-sky conditions is higher than under clear-sky conditions (mean difference: 0.035–  
30 0.064). The MBRI albedo product can be used to estimate sea ice albedo feedback, energy balance analysis and sea ice monitoring. The latest version of our albedo (version 2) and uncertainty datasets are available at <https://doi.org/10.5281/zenodo.11216156> (Ma et al., 2024) and <https://doi.org/10.5281/zenodo.15067607> (Ma et

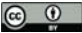

al., 2025), respectively.

1. Introduction

Antarctic sea ice plays an important role in the context of climate change, and its physical parameters are crucial factors for precise climate simulations (Brandt et al., 2005). Snow and ice have the highest albedo of all surface types (Xiong et al., 2002). Changes in the properties and coverage of sea ice, and weather events such as snowfall or sea ice melting, can result in significant changes of the sea ice albedo (Laine, 2008). The melting of ice leads to a decrease in its surface albedo, which in turn promotes more ice melting and a further reduction in albedo, a phenomenon known as the sea ice albedo feedback mechanism (Holland and Bitz, 2003). This feedback mechanism makes the albedo of Antarctic sea ice a crucial factor in polar environmental evolution and global climate modeling (Riihelä et al., 2021). Previous studies have indicated that, despite global warming and Arctic sea ice loss, the Antarctic sea ice extent showed a slightly increasing trend from 1979 to 2016, and a subsequent decline since the end of 2016 (Comiso et al., 2017; Eayrs et al., 2021; Yuan et al., 2017; Zhang et al., 2022).

However, the trend in Antarctic sea ice albedo in recent years remains to be fully understood. Early research estimated sea ice albedo through parameterization schemes. These schemes established empirical functions relating sea ice albedo to environmental parameters such as ice surface temperature, snow depth, and ice thickness, thus providing albedo values for different states of ice melt (Lynch et al., 1995; Parkinson and Washington, 1979; Ross and Walsh, 1987; Schramm et al., 1997). At present, satellite remote sensing is widely used for capturing key sea ice parameters on a large scale. Numerous studies utilize satellite data to calculate the sea ice albedo in the Arctic region and have published several products (Cheng et al., 2023; Key et al., 2001; Liang et al., 2013; Lindsay and Rothrock, 1994; Qu et al., 2016; Riihelä et al., 2013; Stroeve et al., 2005). However, products related to the Antarctic sea ice albedo are limited. The currently available long-time Antarctic sea ice albedo products are developed based on Advanced Very High-resolution Radiometer (AVHRR) data (Table 1), including the AVHRR Polar Pathfinder (APP) albedo product (Key et al., 2001), the APP-extended (APP-x) albedo product (Key et al., 2016; Wang and Key, 2005), and the Satellite Application Facility on Climate Monitoring (CM-SAF) cLOUDs, Albedo and Radiation (CLARA) surface albedo (SAL) product (Karlsson et al., 2023b).

Table 1. Currently available broadband albedo products for Antarctic sea ice.

| Product | Spatial resolution | Temporal resolution | Available period | Sensor |
|---------|--------------------|---------------------|------------------|--------|
| APP     | 5 km               | Twice-daily         | 1981-2005        | AVHRR  |

**Kommentiert [A1]:** Also mention the recent product Niehaus et al. (2024). Melt pond fractions on Arctic summer sea ice retrieved from Sentinel-3 satellite data with a constrained physical forward model. The Cryosphere, 18, 933–956. doi:10.5194/tc-18-933-2024



|           |       |                |              |       |
|-----------|-------|----------------|--------------|-------|
| APP-x     | 25 km | Twice-daily    | 1982-present | AVHRR |
| CLARA SAL | 25 km | Pentad/monthly | 1979-present | AVHRR |

Although these products have been widely employed in Antarctic climate models and made significant

60 progress, they require further improvements. First, they rely on narrow-to-broadband conversion of reflectance under a Lambertian surface assumption, which ignores the anisotropy of the sea ice surface (Karlsson et al., 2023a; Key et al., 2016; Zhou et al., 2023). However, the sea ice surface cannot be simply considered as Lambertian, as dry snow and ice surfaces have strong forward-scattering effects of direction reflectance. Second, they only use the AVHRR channel 1 (0.55–0.90  $\mu\text{m}$ ) and channel 2 (0.725–1.10  $\mu\text{m}$ ) reflectance data in the process of narrow-  
65 to-broadband conversion, not covering the full shortwave range (Stroeve et al., 2005). Finally, the majority of Antarctic sea ice is seasonal ice and experiences frequent snowfall (Campagne et al., 2016; Winkelmann et al., 2012). As a result, these products may not be able to accurately depict the sea ice anisotropy and dynamic changes due to their relatively coarse spatiotemporal resolutions.

The Multiband Reflectance Iteration (MBRI) algorithm was proposed by our previous work (Cheng et al.,  
70 2023) to generate a daily 500 m Arctic sea ice albedo product. This algorithm takes full consideration of the inherent heterogeneity and anisotropy of the sea-ice physical and optical properties for the accurate calculations of Arctic sea-ice albedo from the Moderate Resolution Imaging Spectroradiometer (MODIS). However, the MODIS level-2 surface reflectance data does not cover the Antarctic marine regions. Then, this study used multi-band Visible Infrared Imaging Radiometer Suite (VIIRS) reflectance data with high quality and global coverage  
75 to generate Antarctic sea ice albedo product. We improve the MBRI algorithm, facilitating its applicability for VIIRS reflectance bands for sea ice albedo retrieval. The cloud-induced impacts on sea ice albedo are also corrected. Then we generate the first 1 km, seamless, daily Antarctic sea ice albedo product from 2012 to 2021 (hereafter referred to as the MBRI albedo product). Additionally, we performed an uncertainty analysis and a comprehensive accuracy assessment using in situ measurements and existing products.

80 The rest of this paper is organized as follows. Section 2 introduces the datasets used for the generation and validation of the proposed MBRI albedo product. Section 3 describes the methodology and processing steps. Section 4 presents the uncertainty analysis and validation results. Last, Sections 5, 6 and 7 provide the discussion, data availability and key conclusions of this work, respectively.

2. Data

Kommentiert [A2]: Wording: have strong directional effects of forward scattering

Kommentiert [A3]: multi-band

Kommentiert [A4]: This paper



85 In the proposed MBRI albedo product generation process, multiple remote sensing satellite products and  
 reanalysis product are used as input data. In addition, the MBRI albedo product was comprehensively assessed  
 based on in situ measurements collected from several Antarctic automatic weather stations (AWSs), alongside  
 existing products APP-x and CLARA Edition 3 (CLARA-A3).

## 2.1 Input data

90 The VIIRS/NPP Surface Reflectance Daily L2G Global 1 km and 500 m SIN Grid (VNP09GA) product is  
 the primary source data for calculating Antarctic sea ice albedo under clear-sky conditions. Provided by the Level-  
 1 and Atmosphere Archive & Distribution System Distributed Active Archive Center (LAADS DAAC), the  
 VNP09GA product is available at [https://ladsweb.modaps.eosdis.nasa.gov/missions-and-](https://ladsweb.modaps.eosdis.nasa.gov/missions-and-measurements/products/VNP09GA)  
[measurements/products/VNP09GA](https://ladsweb.modaps.eosdis.nasa.gov/missions-and-measurements/products/VNP09GA) (last access: March 21, 2025). Its M-band data provides daily 1 km surface  
 95 reflectance in the shortwave spectrum. The product spans from January 19, 2012, to the present, and it adopts the  
 Sinusoidal projection, gridded according to the MODIS Sinusoidal Tile Grid.

The 10 m u-component (eastward) and v-component (northward) wind products from the European Centre for  
 Medium-Range Weather Forecasts (ECMWF) Reanalysis v.5 (ERA5) dataset are used for the clear-sky albedo  
 calculations. Compared to previous versions, ERA5 exhibits significant improvements in both spatial and temporal  
 100 resolution, as well as overall accuracy (Dee et al., 2011; Hersbach et al., 2020). Hourly ERA5 data is available at  
<https://doi.org/10.24381/cds.adbb2d47> (last access: March 21, 2025).

The Global Ocean Colour (GlobColour) project, initiated by the European Space Agency (ESA) and available  
 at <https://hermes.acri.fr/> (last access: March 21, 2025), provides a continuous dataset of merged L3 Ocean Colour  
 products (Maritorena et al., 2010). We used the GlobColour chlorophyll concentration to participate in the  
 105 calculation of clear-sky albedo.

To reconstruct the sea ice albedo for pixels missing due to cloud coverage, the Pathfinder Atmospheres-  
 Extended (PATMOS-x) cloud optical depth data was used. The PATMOS-x is provided by the National Oceanic and  
 Atmospheric Administration (NOAA) and available at  
<https://www.ncei.noaa.gov/metadata/geoportal/rest/metadata/item/gov.noaa.ncdc:C00926/html> (last access:  
 110 March 21, 2025). Compared to previous versions, PATMOS-x version 6.0 (Pv6.0) is more stable, with less inter-  
 satellite variability, and provides a more consistent polar cloud detection, phase distribution, and cloud-top height  
 distribution (Foster et al., 2023; Heidinger et al., 2014).

To identify the sea ice pixels, the daily Advanced Microwave Scanning Radiometer 2 (AMSR2) sea ice



concentration (SIC) dataset (3.125 km resolution, provided by the University of Bremen) was used (Melsheimer, 2019). Additionally, a 25 km resolution Special Sensor Microwave Imager/Sounder (SSMIS) SIC product was selected to fill gaps in the AMSR2 SIC data (DiGirolamo et al., 2022). The two SIC products are available at <https://seaice.uni-bremen.de/sea-ice-concentration/amsre-amsr2/> and <https://nsidc.org/data/nsidc-0051/versions/2>, respectively (last access: March 21, 2025). Sea ice extent (SIE) data from the National Snow and Ice Data Center (NSIDC) (Fetterer et al., 2017), available at <https://doi.org/10.7265/NSK072F8> (last access: March 21, 2025), was also employed to conduct a temporal analysis of the proposed albedo dataset.

The information on the input data sets used is summarized in Table 2.

**Table 2. Basic information of input datasets in the study.**

| Input dataset | Parameter                                                 | Spatial resolution | Temporal resolution | Application                     |
|---------------|-----------------------------------------------------------|--------------------|---------------------|---------------------------------|
| VNP09GA       | Surface reflectance, quality flags, solar/view geometries | 1 km               | Daily               | Clear-sky albedo calculation    |
| ERA5          | Wind speed, wind direction                                | 0.25°              | Hourly              | Clear-sky albedo calculation    |
| GlobColour    | Chlorophyll concentration                                 | 4 km               | Daily               | Clear-sky albedo calculation    |
| PATMOS-x      | Cloud optical depth                                       | 0.1°               | Daily               | Cloudy-sky pixel reconstruction |
| AMSR2 SIC     | SIC                                                       | 3.125 km           | Daily               | Sea ice mask, temporal analysis |
| SSMIS SIC     | SIC                                                       | 25 km              | Daily               | Sea ice mask                    |
| NSIDC SIE     | SIE                                                       | /                  | Monthly             | Temporal analysis               |

**2.2 Existing Antarctic sea ice albedo products**

This study uses two Antarctic sea ice albedo datasets as comparative data. One is APP-x, a thematic climate data record that contains 19 variables of the surface, cloud properties, and radiative fluxes (Key et al., 2016), based on AVHRR data. Under a Lambertian surface assumption, Key et al. (2001) retrieved surface albedo from AVHRR channels 1 and 2 reflectance data through four steps, including narrow-to-broadband conversion, top-of-atmosphere (TOA) broadband reflectance anisotropy correction, TOA albedo to surface albedo conversion, and cloudy pixels adjustment. APP-x albedo data are mapped to a 25 km EASE grid at 02:00 and 14:00 (local solar time) for the Antarctic region. The APP-x product is available at <https://www.ncei.noaa.gov/products/climate-data-records/extended-avhrr-polar-pathfinder> (last access: March 21, 2025).

The other dataset is the CLARA-A3 SAL product, which provides radiation parameters and cloud properties, also based on AVHRR data. It includes black-sky, white-sky, and blue-sky surface albedos, presented as monthly

**Kommentiert [A5]:** Correct reference is Spreen et al., 2009: Spreen, G., L. Kaleschke, and G. Heygster (2008), Sea ice remote sensing using AMSR-E 89-GHz channels, *J. Geophys. Res.*, 113, C02S03, doi:[10.1029/2005JC003384](https://doi.org/10.1029/2005JC003384).



and pentad (5-day) averages. It is provided on a 25 km resolution equal-area grid, covering the polar regions. The product accounts for anisotropic effects by averaging the directional sea ice reflectance over a specified period (5 days or more) (Karlsson et al., 2023a). The CLARA-A3 SAL product is available at <https://wui.cmsaf.eu/safira/action/viewProduktDetails?eid=22564&fid=40> (last access: March 21, 2025).

### 2.3. In situ measurements

This study also collected several in situ measurement datasets to evaluate the accuracy of the MBRI albedo product.

The World Climate Research Programme Baseline Surface Radiation Network (BSRN) provides high-quality ground-based radiation measurements every minute since 1992. This study selects measurements from the SYO and GVN stations of the BSRN. The SYO station is located on East Ongul Island in East Antarctica, about 4 km from the continent, with sea ice as the observed surface type (Tanaka, 2022). The GVN station is located on the Ekström Ice Shelf, in the Atka Bay area of the northeastern Weddell Sea (König-Langlo and Loose, 2007). The measurements of GVN and SYO stations is available at <https://bsrn.awi.de/data/data-retrieval-via-pangaea/> (last access: March 21, 2025).

Since 1995, the Institute for Marine and Atmospheric Research Utrecht (IMAU) at Utrecht University has deployed 19 AWSs in Antarctica, measuring a range of meteorological and atmospheric parameters. Considering the measured parameters and locations of the AWSs, this study selected data from AWS5 (two-hourly) and AWS17 (hourly) for validation. AWS5 is located on the Riiser-Larsen Ice Shelf, while AWS17 is situated on the remnants of the Larsen B Ice Shelf at Scar Inlet (Jakobs et al., 2020). Further data details can be found at <https://doi.pangaea.de/10.1594/PANGAEA.974080> (last access: March 21, 2025).

This study also collected measurement datasets from several AWSs deployed by the Alfred Wegener Institute (AWI), Helmholtz Centre for Polar and Marine Research. One dataset is from AWSs installed by Hoppmann et al. in 2012 and 2013, located nearly at the same site on the Atka Bay land-fast sea ice (named Atka Bay AWS2 2012 and Atka Bay AWS 2013, 1-minute interval). These stations recorded the transformation of a first-year fast ice in Atka Bay into thick second-year sea ice, which eventually disintegrated into small floes (Hoppmann et al., 2015a, b). Another dataset comes from the radiation station (named Buoy 2018R1, hourly) installed by Nicolaus et al. in 2018 on a first-year ice in the Weddell Sea, which drifted with the coastal currents (Nicolaus et al., 2024). These datasets are available at <https://doi.pangaea.de/10.1594/PANGAEA.824527>, <https://doi.pangaea.de/10.1594/PANGAEA.833975> and <https://doi.org/10.1594/PANGAEA.949507>, respectively



(last access: March 21, 2025).

The station locations are shown in Fig. 1, with further details provided in Table 3.

165

Figure 1. Distribution map of the in situ stations.

Table 3. Basic information of the in situ stations.

| Station            | Latitude (°)                     | Longitude (°)                    | Elevation (m) | Surface type | Period of Data Usage     |
|--------------------|----------------------------------|----------------------------------|---------------|--------------|--------------------------|
| BSRN SYO           | −69.0053                         | 39.5811                          | 18.0          | Sea ice      | 2012-01-19 to 2021-12-31 |
| BSRN GVN           | −70.6500                         | −8.2500                          | 42.0          | Ice shelf    | 2012-01-19 to 2021-12-31 |
| IMAU AWS5          | −73.1053                         | −13.1647                         | 366.0         | Ice shelf    | 2012-01-19 to 2014-02-07 |
| IMAU AWS17         | −65.9333                         | −61.8500                         | 73.0          | Ice shelf    | 2012-01-19 to 2016-03-10 |
| Atka Bay AWS2 2012 | −70.57533                        | −8.04945                         | 2.4           | Sea ice      | 2012-10-02 to 2012-12-27 |
| Atka Bay AWS 2013  | −70.57522                        | −8.04935                         | 2.0           | Sea ice      | 2013-05-31 to 2014-01-03 |
| Buoy 2018R1        | Start: −74.5482<br>End: −73.5042 | Start: −37.0340<br>End: −41.2350 | 1.0           | Sea ice      | 2018-02-26 to 2018-11-16 |

3. Methodology

3.1 Framework

170

The accurate inversion of surface albedo relies on the construction of the Bidirectional Reflectance

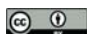

Distribution Function (BRDF). The MBRI algorithm assumes the sea ice BRDF is a linear combination of the BRDFs associated with ocean water and snow/ice. Building upon the assumption, the sea ice BRDF is retrieved by an iterative process with single-angular/date multiband reflectance data. The sea ice broadband albedo is subsequently estimated from multi-band satellite observations (Cheng et al., 2023). In contrast to conventional  
175 algorithms relying on multi-date/angular data, the MBRI algorithm enables the acquisition of albedo with finer temporal resolution and enhances the representation of rapid changes occurring on the sea ice surface.

Figure 2 presents the flowchart for the generation of the MBRI albedo product. This method involves three key steps: (1) BRDF model establishment: The sea ice BRDF is constructed based on radiative transfer models and derived through an iterative process to express it explicitly. (2) Broadband albedo estimation: The narrowband  
180 albedo is estimated by integrating the derived sea ice BRDF over the angles of incidence and reflection, and the broadband albedo is then calculated by the narrowband to broadband (NTB) conversion. (3) Reconstruction of cloudy-sky albedo: The sea ice albedo of cloudy pixels is reconstructed by integrating spatiotemporal information and physical models. These steps are elaborated upon in the following subsections.



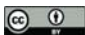

185 **Figure 2. Flowchart for the generation of the proposed Antarctic sea ice albedo product.**

### 3.2 Establishment and calculation of the sea ice BRDF model

#### 3.2.1 Sea ice BRDF establishment

In polar regions, the sea ice cover is typically considered to comprise snow-covered ice, bare ice, melt ponds, and open water. At the scale of remote sensing satellite pixels, the reflectance of sea ice and melt ponds can be jointly determined by the reflectance of snow, ice, and ocean water. Consequently, its value can be approximated as a linear summation of these three components (Qu et al., 2016). Note that the determining factors for the optical parameters of bare ice closely are similar to those of snow (Kokhanovsky and Zege, 2004; Zege et al., 2015). Therefore, the MBRI algorithm considers ice and snow as a unified entity and employs a single model to describe their reflectance properties. Based on the above, the sea ice BRDF model can be expressed as (Cheng et al., 2023):

$$B_{\text{sea-ice}} = f_s \cdot B_{\text{snow/ice}} + (1 - f_s) \cdot B_{\text{ocean}}, \quad (1)$$

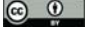

Where  $B_{sea-ice}$ ,  $B_{snow/ice}$ , and  $B_{ocean}$  are the BRDF over the surfaces of sea ice, snow/ice, and ocean water,

respectively; and  $f_s$  represents the fraction of snow/ice in a mixture of snow, ice, and seawater, where these

components are blended in varying proportions.

The Asymptotic Radiative Transfer (ART) model has been demonstrated to accurately characterize the reflectance properties over snow/ice surfaces (Zege et al., 2011). We employed this model for the BRDF of snow/ice surface as follows:

$$B_{snow/ice}(\theta_s, \theta_v, \varphi) = B_0(\theta_s, \theta_v, \varphi) \exp \left[ -t \frac{g(\theta_s)g(\theta_v)}{B_0(\theta_s, \theta_v, \varphi)} \right], \quad (2)$$

where  $\theta_s$ ,  $\theta_v$ , and  $\varphi$  are the solar zenith angle (SZA), view zenith angle (VZA) and relative azimuth angle (RAA), respectively.  $B_0(\theta_s, \theta_v, \varphi)$  is the BRDF of the semi-infinite non-absorbing layer, which can be expressed

as (Kokhanovsky et al., 2005):

$$B_0(\theta_s, \theta_v, \varphi) = \frac{a + b(\cos \theta_s + \cos \theta_v) + c \cos \theta_s \cos \theta_v + p(\Theta)}{4(\cos \theta_s + \cos \theta_v)}, \quad (3)$$

where  $a = 1.247$ ,  $b = 1.186$ , and  $c = 5.157$ ;  $p(\Theta)$  is the phase function; and  $\Theta$  is the scattering angle (measured

in degrees). The latter two can be parameterized as:

$$p(\Theta) = 11.1 \exp(-0.087\Theta) + 1.1 \exp(-0.014\Theta), \quad (4)$$

$$\Theta = \arccos(-\cos \theta_s \cos \theta_v + \sin \theta_s \sin \theta_v \cos \varphi). \quad (5)$$

Zege et al. (2011) defined the escape function  $g(\theta)$  at zenith angle  $\theta$  as the fraction of the absorbed energy from a semi-infinite medium under diffuse illumination ( $t$ ) in (2), as follows:

$$g(\theta) = \frac{3}{7} (1 + 2 \cos \theta), \quad (6)$$

$$(7)$$

where  $\lambda$  represents wavelength;  $a_{eff}$  is the snow/ice effective grain size;  $C$  is a parameter representing the

<https://doi.org/10.5194/essd-2025-79>  
Preprint. Discussion started: 9 May 2025  
© Author(s) 2025. CC BY 4.0 License.

Open Access  
Earth System  
Science  
Data  
Discussions



absorption capacity at wavelength  $\lambda$  of soot pollutants in snow, determined by its relative concentration;  $A$  is a parameter representing the particle's shape, taking a value of 5.8 in this study; and  $\chi$  is the imaginary part of the complex refractive index of snow/ice, with values for different wavelengths obtained online at [http://www.atmos.washington.edu/ice\\_optical\\_constants](http://www.atmos.washington.edu/ice_optical_constants) (Warren and Brandt, 2008).

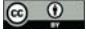

220 If the values of the wavelength-independent unknown variables  $a_{ef}$  and  $C$  are determined, then the reflectance of snow/ice surfaces in any incident and reflection direction at a specified wavelength can be represented by Eq. (2).

In addition, the BRDF over the ocean water surface is derived using the three-component ocean water albedo (TCOWA) model proposed by Feng et al. (2016), as follows:

$$225 \quad B_{ocean} = f_w \cdot B_{wc} + (1 - f_w) \cdot (B_g + B_{nl}), \quad (8)$$

where  $B_{wc}$ ,  $B_g$ , and  $B_{nl}$  are the BRDFs of whitecaps, sun glint, and water-leaving, respectively;  $f_w$  is the

coverage of whitecaps. According to previous studies, the four components can be explicitly expressed as functions of chlorophyll concentration, wind speed/direction, wavelength, and solar/view geometries (Callaghan et al., 2008; Cox and Munk, 1954; Feng et al., 2016; Morel et al., 2002; Wang et al., 2023).

### 230 3.2.2 Sea ice BRDF model calculation

Eqs. (2)–(8) indicate that three unknown parameters still exist in the established sea ice BRDF model: soot pollutant relative concentration  $C$ ; fraction of snow/ice  $f_i$ ; and snow/ice effective grain size  $a_{ef}$ . To simplify

the representation, we define vector  $\mathbf{X} = (a_{ef}, C, f_i)$ . These three parameters are inherent properties of sea ice

and are wavelength-independent. Therefore, if there are three or more observational values at different wavelengths,

235 an inversion method can be employed to calculate them.

In this paper, considering that the absorption spectrums of soot pollutants and snow/ice grain are mainly in the visible and near-infrared bands, respectively (Zege et al., 2011), we utilized the reflectance data from VIIRS channels 3 (490 nm), 7 (865 nm), and 8 (1240 nm), and solar/view geometries as the observational values. As Eq.

(1) is nonlinear, the Newton–Raphson iteration method (Winkler, 1993) is employed to calculate the three unknown

240 parameters for each pixel. In the iteration procedure, we take the natural logarithm of the three unknown parameters

to reduce the impact of significant differences in their magnitudes on the calculation. The matrix  $\mathbf{M}$ , representing the derivatives of  $B_{sea-ice}$  with respect to each component of vector  $\mathbf{X}$ , is then computed as:



$$\mathbf{M} = \begin{pmatrix} \frac{\partial B^3}{\partial \ln X_k} & \frac{\partial B^7}{\partial \ln X_k} & \frac{\partial B^8}{\partial \ln X_k} \end{pmatrix} = \begin{pmatrix} \frac{\partial B^3}{\partial \ln X_k} & \frac{\partial B^7}{\partial \ln X_k} & \frac{\partial B^8}{\partial \ln X_k} \end{pmatrix} = \begin{pmatrix} \frac{\partial B^3}{\partial \ln a_{ef}} \frac{\partial \ln a_{ef}}{\partial \ln X_k} & \frac{\partial B^7}{\partial \ln a_{ef}} \frac{\partial \ln a_{ef}}{\partial \ln X_k} & \frac{\partial B^8}{\partial \ln a_{ef}} \frac{\partial \ln a_{ef}}{\partial \ln X_k} \\ \frac{\partial B^3}{\partial \ln C} \frac{\partial \ln C}{\partial \ln X_k} & \frac{\partial B^7}{\partial \ln C} \frac{\partial \ln C}{\partial \ln X_k} & \frac{\partial B^8}{\partial \ln C} \frac{\partial \ln C}{\partial \ln X_k} \\ \frac{\partial B^3}{\partial \ln f_s} \frac{\partial \ln f_s}{\partial \ln X_k} & \frac{\partial B^7}{\partial \ln f_s} \frac{\partial \ln f_s}{\partial \ln X_k} & \frac{\partial B^8}{\partial \ln f_s} \frac{\partial \ln f_s}{\partial \ln X_k} \end{pmatrix}, \quad (9)$$

where  $X_k$  is the  $k$ -th component of  $\mathbf{X}$ . According to studies on snow/ice physical parameters (Dang et al., 2015;

245 Yang et al., 2017; Zege et al., 2015),  $\mathbf{X}$  can be initialized with the values  $a_{ef} = 300 \mu m$ ,  $C = 2 \times 10^{-6}$  and

$f_s = 0.5$ , representing the initial state.  $B_{sea-ice}^i$  is the BRDF in the  $i$ -th channel ( $i = 3, 7, 8$ ), which can be

interpreted as the reflectance in the  $i$ -th channel, calculated using Eq. (1) at specific viewing and solar angles.

Following this, vector  $\mathbf{X}$  is updated using the correction  $\Delta X_k$  as follows:

$$\Delta X_k = (\mathbf{B} - \mathbf{B}^n) \mathbf{M}^{-1}, \quad (10)$$

$$250 \quad X_k^{n+1} = X_k^n \exp(\Delta X_k), \quad (11)$$

where  $n$  is the  $n$ -th iteration;  $\mathbf{B} = (B^i)$  is the vector composed of the observed reflectance of the VIIRS  $i$ -th

channel; and  $\mathbf{B}^n$  is the vector of  $B_{sea-ice}^i$  on the  $n$ -th iteration step. The nonlinearity of Eq. (9) ensures that

matrix  $\mathbf{M}$  does not exhibit linear dependence. Therefore, the result obtained from the iterative procedure is a non-singular solution. The iteration loop breaks when:

$$255 \quad \max(\Delta X_k) < 0.001, \quad (12)$$

and typically converges after three to four iterations.

### 3.3 Broadband albedo estimation

The black-sky albedo, also denoted as directional-hemispherical reflectance, is defined as the albedo of a surface under radiation from a single direction and without atmospheric scattering. It can be expressed as the

260 integration of the BRDF over the viewing semi-hemisphere as follows (Schaeppman-Strub et al., 2006):

$$\alpha = \frac{1}{2\pi} \int_{\Omega} B_{\theta, \phi} d\Omega$$


 $\rho) \cos \theta \sin \theta d\theta d\varphi,$

$$\int_0^{\lambda_{\text{max}}} \int_0^{\lambda_{\text{min}}} \alpha_{\text{ice}}(\lambda) \cos \theta \sin \theta d\theta d\varphi$$

(13)

where  $\alpha_{\text{ice}}$  is the black-sky albedo for each band;  $\varphi_s$  and  $\varphi_v$  is the solar and view azimuth angles, respectively.

Under ideal isotropic diffuse radiation, the surface albedo is referred to as white-sky albedo or bi-



hemispherical albedo (Qu et al., 2015). The white-sky albedo ( $\alpha_{wsa}$ ) is obtained through further integration over

all solar incident angles:

$$\alpha_{wsa} = \frac{1}{4\pi} \int_0^{2\pi} \int_0^{\pi/2} \alpha_{bsa} \cos \theta \sin \theta d\theta d\varphi. \quad (14)$$

Natural daylight irradiation lies between complete direct illumination and complete scattering. Consequently, the blue-sky albedo, representing the true surface albedo, can be obtained by combining the black-sky albedo and white-sky albedo with appropriate weighting (Pinty et al., 2005; Qu et al., 2015):

$$\alpha_{blue} = (1 - \gamma) \cdot \alpha_{bsa} + \gamma \cdot \alpha_{wsa}, \quad (15)$$

where  $\alpha_{blue}$  is the blue-sky albedo; and  $\gamma$  is the diffuse skylight fraction. Under clear-sky conditions,  $\gamma$  can be empirically calculated as follows (Qu et al., 2016):

$$\gamma = 0.122 + 0.85 \exp(-4.8 \cos(\theta_s)), \quad (16)$$

where  $\theta_s$  is SZA.

The broadband surface albedo is obtained through linearly weighted calculations of narrowband albedo. (Liang, 2000). In this study, we adopt the narrow-to-broadband conversion coefficients as follows (Liu et al., 2017):

$$\alpha = 0.2892\alpha_1 - 0.4141\alpha_2 + 0.6996\alpha_3 + 0.2738\alpha_4 + 0.1463\alpha_5 - 0.0309\alpha_{10}, \quad (17)$$

where  $\alpha$  is the broadband albedo covering the shortwave spectral range; and  $\alpha_i$  is the narrowband blue-sky albedo for the selected VIIRS spectral channel (1, 2, 3, 7, 8, and 10).

### 3.4 Reconstruction of sea ice albedo under cloudy-sky

In the Antarctic sea ice regions, where continuous cloud coverage reaches 60–90%, substantial missing data exists in the albedo product estimated from VIIRS. Cloud radiative forcing has a notable impact on the albedo of snow/ice surfaces (Key et al., 2001; Stapf et al., 2020). To accurately express the cloudy-sky sea ice albedo, and to enhance the spatiotemporal continuity, this study combines spatiotemporal and physical modeling to reconstruct

sea ice albedo under cloudy-sky conditions

First, a spatiotemporal averaging interpolation method is used to obtain the initial reference albedo for cloudy pixels as follows:

$$\sum_{15} \alpha^l(x_i, y_i)$$

<https://doi.org/10.5194/essd-2025-79>  
Preprint. Discussion started: 9 May 2025  
c Author(s) 2025. CC BY 4.0 License.



$$\alpha^j(x,y)=\frac{(x,y)\in\Omega}{m},$$





where  $\alpha(x, y)$  is the initial reference albedo for the target pixel  $(x, y)$ ;  $\Omega$  is the neighborhood  $3 \times 3 \times 3$  window of the target pixel;  $\alpha(x_i, y_i)$  and  $m$  are the albedo and total number of other valid pixels in  $\Omega$ , respectively; This calculation is iterated 10 times to ensure the filling of nearly all cloud pixels.  $j$  is the number of iterations in the loop.

Assuming a cloudy pixel's initial reference albedo annual time series is denoted as  $y_i$ , we employ the Whittaker smoother (Eilers, 2003) to denoise and fit series  $z$ , which is regarded as the hypothetical clear-sky albedo, as follows:

$$z = (I + \rho D'D)^{-1} I y_i, \quad (19)$$

where  $I$  is a diagonal weight matrix, with 0 assigned for missing data and 1 otherwise;  $D$  is the first-order difference matrix of the identity matrix; and  $\rho$  is the smoothing parameter and controls the smoothness of  $z$ . Ye et al. (2023) determined  $\rho = 5$  yielded the optimal overall performance in reconstructing the albedo of the Greenland Ice Sheet.

Following this, we estimate the cloudy-sky albedo based on the hypothetical clear-sky albedo as follows (Key et al., 2001):

$$\alpha_{rec} = \beta_1 + \beta_2 \alpha_{hyp} + \beta_3 \ln(\tau + 1) + \beta_4 \cos \theta_i, \quad (20)$$

where  $\alpha_{rec}$  and  $\alpha_{hyp}$  represent the reconstructed cloudy-sky albedo and hypothetical clear-sky albedo, respectively;  $\tau$  is the cloud optical depth;  $\theta_i$  is SZA; and  $\beta_i$  are empirical coefficients with values of -0.0491243, 1.06756, 0.0217075, and 0.0179505 respectively.

The steps outlined above encompass the comprehensive process of generating the daily 1 km seamless Antarctic sea ice albedo product.

#### 4. Results

##### 4.1 Uncertainty analysis

###### 4.1.1 Uncertainty of clear-sky albedo retrieval

**Kommentiert [A6]:** Only give meaningful number of digits, assumed 2 or 3.

<https://doi.org/10.5194/essd-2025-79>  
Preprint. Discussion started: 9 May 2025  
© Author(s) 2025. CC BY 4.0 License.

Open Access  
Earth System  
Science  
Data  
Discussions

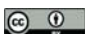

The production process of the MBRI albedo product can be broadly divided into clear-sky albedo retrieval and cloudy-sky albedo reconstruction. In the retrieval process, the model used in this study is complex, involving processes such as derivation and integration, making it difficult to derive the Gaussian error propagation formula.



Therefore, the Monte Carlo method was used to assess the retrieval uncertainty (Mears et al., 2011; Zhou et al., 2018). First, each input parameter for 2012–2021 was divided into four seasons (spring: October–December, summer: January–March, autumn: April–June, and winter: July–September), and the ten-year mean for each parameter was calculated. The uncertainty for each parameter was referenced from the settings in previous studies or the validation accuracy (Jourdi r, 2020; Le  n-Tavares et al., 2024; Saulquin et al., 2019), as shown in Table 4. Notably, some angular data did not provide uncertainty, so the standard deviation (STD) of the mean was used as a substitute. Next, for each pixel, samples were drawn from the range of  $\mu \pm \sigma$  (where  $\mu$  is the mean and  $\sigma$  is the uncertainty for each parameter, with a sample size of 100 to balance computational efficiency and result stability). Finally, the albedo results for each pixel were obtained by inputting the samples into the model, with the standard deviation of the results representing the uncertainty for that pixel.

Table 4. Uncertainties of input parameters.

| Parameter                                      | Uncertainty |
|------------------------------------------------|-------------|
| Surface reflectance                            | 0.05        |
| Solar/view geometries ( )                      | STD         |
| Wind speed (m/s)                               | 1.5         |
| Wind direction ( )                             | STD         |
| Chlorophyll concentration (mg/m <sup>3</sup> ) | 0.02        |

Figure 3 shows the spatial distribution of clear-sky albedo retrieval uncertainty for the four seasons. The average uncertainties for spring and summer are approximately 0.030 and 0.029, respectively, higher than the values 0.015 and 0.016 observed in autumn and winter. In autumn and winter, over 90% of pixels have uncertainties less than 0.02. The annual average sea ice albedo uncertainty is 0.022. Spatially, uncertainty is relatively higher in the marginal ice zone and coastline, while it is lower in stable pack ice areas. This may be due to the stronger influence of open water and ocean currents in these regions, leading to more significant changes in sea ice conditions, particularly in spring and summer, resulting in higher uncertainty in albedo retrieval.

Kommentiert [A7]: Could'nt this way STD take large values?

Kommentiert [A8]: Explain STD also here for easier reading

Kommentiert [A9]: This line uses larger font than the others.



335 **Figure 3. Spatial distribution of clear-sky retrieval albedo uncertainty for the four seasons. The histogram in the lower-left corner of each subplot shows the proportion of pixels with uncertainty less than 0.02 and greater than 0.02.**

In addition, the anisotropy of the sea ice surface means that satellite-observed surface radiation is not only related to the direction of solar incidence, but also to the direction of observation. As shown in Eq. (2), the BRDF is a function of the solar/view geometries. Qu et al. (2016) pointed out that the accuracy of sea ice albedo retrieval varies significantly with different solar/view geometries, with errors exceeding 0.3 in cases based on the Lambertian assumption. To analyze the relationship between uncertainty and solar/view geometries, we sampled the results for all pixels across the four seasons based on the angle distribution proportions (sample size = 50,000). Kernel Density Estimation (KDE) was then applied to obtain the distributions of sample uncertainty with respect to SZA and VZA, as well as their correlation. Fig. 4a shows the KDE distribution of albedo uncertainty with respect to SZA. Around 60° SZA, a relatively high uncertainty (up to approximately 0.045) is observed for more sample pixels, and decreases with increasing SZA (slope = -0.0005,  $p < 0.01$ ). Fig. 4b shows that the uncertainty is less sensitive to changes in the VZA (slope = 0.0001,  $p < 0.01$ ). It should be noted that some angles have a small proportion, which may not be well represented in the KDE distribution and correlation statistics. Therefore, based on the results in Fig. 4a, two SZA ranges were selected for further analysis: range 1 (55–65°), where uncertainty is relatively higher, and range 2 (75–85°), where the SZA is more concentrated. The VZA (0–71°) and RAA (0–360°) were divided into angular bins with intervals of 2.5° and 5°, respectively. Then, the average uncertainty of

**Kommentiert [A10]:** Which fraction of observations does each of the ranges comprise?



each angular bin for range 1 and range 2 was calculated, as shown in Fig. 5. In SZA range1 (Fig. 5a), most angular bins exhibit uncertainties less than 0.02, with slightly higher uncertainty in the backward direction (RAA near 0°). The largest uncertainty, exceeding 0.1, is observed at higher VZAs in the backward directions. Similarly, in SZA range 2 (Fig. 5b), most angular bins maintain uncertainties below 0.02, with the largest values again appearing at higher VZAs in the backward directions. Additionally, a few larger uncertainties occur at higher VZAs across other RAA directions. The large uncertainties in the backward directions likely stem from the strong forward-scattering characteristics of the sea ice surface, making the model more sensitive to changes in the backward azimuth angle. However, according to the histogram in Fig. 3, these anomalous angles account for only a small fraction of the total albedo retrieval.

360

Figure 4. Kernel Density Estimation (KDE) plots of the uncertainty in sea ice albedo retrieval as a function of (a) solar zenith angle (SZA) and (b) satellite zenith angle (VZA). The histograms in the upper-right corners of each subplot represent the angular distributions. The black solid line denotes the fit line, while the red boxes in (a) indicate the two selected SZAranges.

365

Figure 5. Angular distribution of the mean uncertainty in sea ice albedo retrieval. (a) Solar zenith angle from 55° to 65°; (b) Solar zenith angle from 75° to 85°. In the polar coordinate system, the radial direction represents the view zenith angle (from 0° to 71°), the angle direction represents the relative azimuth angle (from 0° to 360°). Blank areas indicate the absence of data for those angular bins in the sample.

370 4.1.2 Uncertainty of cloudy-sky albedo reconstruction

Kommentiert [A11]: Any comment on the increased uncertainty in the RAA directions 65° and 245°, most pronounced in Fig. 5(b), but also visible in (a)?



As described in Section 3.4, the cloudy-sky albedo is reconstructed based on the albedo of adjacent clear-sky pixels. Therefore, the cloudy-sky albedo uncertainty originates from the propagation of clear-sky albedo uncertainty (retrieval uncertainty) through the reconstruction process. According to Gaussian error propagation, the relationship can be expressed as:

$$\sigma_{\text{cld}}^2 = \sigma_{\text{clr}}^2 + \sigma_{\text{rec}}^2, \quad (21)$$

where  $\sigma_{\text{cld}}$  represents the uncertainty of cloudy-sky albedo;  $\sigma_{\text{clr}}$  is the retrieval uncertainty of clear-sky albedo;

$\sigma_{\text{rec}}$  denotes the uncertainty introduced by the reconstruction process.

Equations (18)–(20) correspond to the key steps in the reconstruction of cloudy-sky albedo: interpolation of adjacent clear-sky pixels, temporal smoothing, and cloud radiative forcing correction. To simplify the uncertainty estimation, we treat interpolation and smoothing as a whole process and assume that errors from satellite angles are negligible. Based on Equation (20), we derive the following relationship:

$$\sigma_{\text{rec}}^2 = \left( \frac{\partial \alpha_{\text{rec}}}{\partial \alpha_{\text{hyp}}} \cdot \sigma_{\text{hyp}} \right)^2 + \left( \frac{\partial \alpha_{\text{rec}}}{\partial \alpha_{\text{r}}} \cdot \sigma_{\text{r}} \right)^2 = \left( \beta_{\text{hyp}} \cdot \sigma_{\text{hyp}} \right)^2 + \left( \beta_{\text{r}} \cdot \sigma_{\text{r}} \right)^2, \quad (22)$$

where  $\sigma_{\text{hyp}}$  is the uncertainty from the interpolation and smoothing process;  $\sigma_{\text{r}}$  is the cloud optical depth

uncertainty. Based on previous studies (Walther, et al., 2012), the error in PATMOS-x cloud optical thickness can reach 20%, so  $\sigma_{\text{r}} = \tau \cdot 0.2$ .

To estimate  $\sigma_{\text{hyp}}$ , we randomly masked some clear-sky pixels (over 400,000) and then reconstructed their albedo using interpolation and smoothing following Eq. (18) and Eq. (19). Fig. 6a presents a scatter plot comparing the hypothetical albedo with the original clear-sky albedo, showing a correlation ( $R=0.85$ ) and an RMSE of 0.065. Additionally, we analyzed the distribution of differences with respect to day of the year (DOY) and latitude (Fig. 6b and 6c). The differences exhibit a generally uniform horizontal distribution, indicating that interpolation and smoothing errors have no significant dependency on time or latitude. Therefore, we set  $\sigma_{\text{hyp}} = 0.065$ , while  $\sigma_{\text{rec}}$  can be derived from the cloud optical depth data.



395 **Figure 6. (a) Scatter plot of original albedo versus hypothetical albedo for the masked clear-sky pixels. Distribution of albedo differences with (b) DOY and (c) latitude.**

To obtain daily MBRI albedo uncertainty dataset, the uncertainty for clear-sky pixels was determined based on the seasonal mean retrieval uncertainties derived in Section 4.1.1 (spring: 0.03, summer: 0.029, autumn: 0.015, winter: 0.016). The cloudy-sky albedo uncertainty was calculated using Eq. (21).

#### 4.2 Validation with in situ measurements

400 The estimation errors in the MBRI albedo product primarily arise from three sources: errors caused by estimation of the retrieved model, sensor noise in the input dataset, and errors related to different solar/view geometries (as discussed in Section 4.1). These errors can be quantitatively assessed using in situ measurements. The in situ measurement datasets collected in this study is listed in Table 3.

405 The in situ measurement was first preprocessed. Except for Buoy 2018R1, which directly provides albedo values, the albedo values from other stations are derived from the ratio of shortwave upward (SWU) to shortwave downward (SWD) radiation. After filtering the data based on quality flags, daily albedo values are obtained by averaging the measurements taken near local solar noon. For the MBRI albedo product, in order to reduce geographic matching errors, the nearest pixel to each station is selected, and a 3x3 window average is used as the reference value for validation. Furthermore, when compared to APP-x product, the MBRI albedo product is

410 resampled at a 25 km resolution, and when compared to CLARA-A3 product, the resampled MBRI albedo and in situ measurements are averaged over a 5-day period.

Figure 7 shows scatter plots comparing in situ measurements with three estimated albedo products. The root mean square error (RMSE) for the original resolution MBRI albedo product and BSRN (including GVN and SYO



stations) measurements is 0.071, with a correlation coefficient of 0.67 (Fig. 7a). After resampling the MBRI  
product to a 25 km resolution, the RMSE decreases to 0.064, while the RMSE for the APP-x product is 0.134 (Fig.  
7b). The RMSE for the MBRI product further decreases to 0.054 after averaging over 5 days, while the  
corresponding RMSE for the CLARA-A3 product is 0.071 (Fig. 7c). Additionally, the MBRI product demonstrates  
the best correlation with the in situ measurements.

When compared to IMAU AWS measurements (including AWS5 and AWS17) (Fig. 7d-f), the RMSE for the  
MBRI product is 0.071, unchanged after resampling to 25 km, and decreased to 0.055 after 5 days of averaging.  
The RMSE for the other two products is 0.136 and 0.048, respectively. Since AWS5 and AWS17 are located on  
more stable ice shelves, where albedo measurements exhibit smaller seasonal variations, the scatter plots show a  
more clustered distribution (Jakobs et al., 2020; Stroeve et al., 2005). Therefore, although the correlation coefficients  
are generally lower, the MBRI product still provides the best performance.

Compared to the Atka Bay AWSs, the MBRI albedo product also shows the best accuracy (Fig. 7g-i), with  
RMSE values of 0.062, 0.059, and 0.055 for the original, 25 km resampled, and 5-day averaged albedo, respectively.  
The corresponding RMSE for the APP-x and CLARA-A3 products are 0.164 and 0.062, respectively. Although the  
number of measurements for Buoy 2018R1 is limited, the MBRI product still demonstrates the smallest RMSE:  
0.076, 0.072, and 0.085 (Fig. 7j-l). In contrast, the other two products show relatively poorer  
performance.

Kommentiert [A12]: Among





Figure 7. Scatter plots comparing the estimated albedo products with in situ measurements. (a)-(c) compare with BSRN measurements; (d)-(f) compare with IMAU AWS measurements; (g)-(i) compare with Atka Bay AWS measurements; (j)-(l) compare with Buoy 2018R1 measurements. Blue dots represent the MBRI albedo product; green inverted triangles represent the APP-x product; yellow triangles represent the CLARA-A3 product. The black dashed line represents the 1:1 line, and the solid line represents the fitted line ( $p$ -value  $< 0.01$ ).  $N$  represents the number of comparisons,  $R$  represents the correlation coefficient, bias represents the mean difference error, and RMSE is the root mean square error.

This study summarizes the validation results between the MBRI albedo product and in situ measurements



440 from all stations, as shown in Fig. 8. Overall, the MBRI albedo product exhibits a good agreement with the ground truth values ( $R = 0.60$ ), with an RMSE of 0.071 and a bias of -0.02. The slight underestimation of the MBRI albedo may be due to the broader spatial coverage of satellite observations compared to AWS. When sea ice further from the AWS begins to melt, AWS sensors only capture the albedo of ice and snow, while satellite pixels represent a mixture of snow/ice, melt ponds, and open water, leading to an underestimation of the albedo (Stroeve et al., 2005).

445 Fig. 9 shows the distribution histogram of the bias (estimated albedo minus in situ measurements). Although the average bias for all three products is relatively small, their distributions differ. The bias distributions for the MBRI albedo product and CLARA-A3 product are similar, clustering around zero, indicating that both products have small differences and high stability. In contrast, the bias distribution for the APP-x product is more scattered, with larger errors. Additionally, all these products show a slight negative bias trend. Given the relatively poor accuracy

450 of APP-x product, it did not participate in the following comparison.

Kommentiert [A13]: Give sigma value

Kommentiert [A14]: was excluded from

Figure 8. Probability density scatter plot of the MBRI albedo product compared to all in situ measurements.

455 Figure 9. Bias distribution histograms of three albedo products compared to in situ measurements. Blue represents the MBRI albedo product, green represents the APP-x product, and yellow represents the CLARA-A3 product.

Additionally, several albedo time series were randomly selected for comparison, as shown in Fig. 10. It is



evident that the MBRI albedo product shows continuous temporal variation, demonstrating the effectiveness of albedo reconstruction under cloudy-sky condition. Taking the BSRN SYO station as an example (Fig. 10a), the observed sea ice albedo varies between 0.6 and 0.95 during this period. Between days 20 and 40, the albedo  
460 increases and then decreases, while between days 70 and 100, two peaks are observed. The daily MBRI albedo time series effectively captures these changes and is consistent with the in situ measurement time series. In contrast, the CLARA-A3 product, with a 5-day resolution, is less effective at capturing the rapid changes in sea ice albedo and lacks temporal continuity.

465 **Figure 10. Randomly selected albedo time series at (a) BSRN SYO; (b) BSRN GVN; (c) IMAU AWS17; (d) Atka AWS2 2012. The red line represents in situ measurements, the blue line represents the MBRI albedo product, and the yellow dots represent the CLARA-A3 albedo product.**

Overall, the MBRI albedo product proposed in this study shows good agreement with in situ measurements and demonstrates satisfactory accuracy. The accuracy of the APP-x albedo product is slightly lower, and its RMSE  
470 is basically consistent with the validation results of Key et al. (2016). Although the CLARA-A3 product also provides acceptable accuracy, its relatively coarse spatiotemporal resolution and cloud gaps make it less effective than the MBRI product in capturing detailed changes in sea ice. Therefore, it can be concluded that the performance of the MBRI albedo product is superior.

#### 4.3 Temporal and spatial analysis

**Kommentiert [A15]:** Insert something like 'Figures 10 (b) to (d) present more examples confirming these findings.' in order to give reason for showing them.

<https://doi.org/10.5194/essd-2025-79>  
Preprint. Discussion started: 9 May 2025  
© Author(s) 2025. CC BY 4.0 License.

Open Access  
Earth System  
Science  
Data  
Discussions

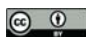

475

To explore the potential use of albedo in studies of Antarctic sea ice changes, the monthly mean albedo



anomalies for Antarctic sea ice from 2012 to 2021 were calculated based on the MBRI and CLARA-A3 albedo products. To illustrate the consistency between changes in albedo and sea ice variations, anomalies in the monthly mean SIC and SIE were also calculated, as shown in Fig. 11. The SIC anomaly exhibits a strong correlation with albedo anomalies from both the MBRI (Fig. 11a) and CLARA-A3 (Fig. 11b) products, with correlation coefficients of 0.78 and 0.52, respectively. In terms of temporal variation, before August 2015, most monthly mean anomalies of all three parameters were positive (with only a few exceptions), indicating sea ice accumulation. After this period, SIE anomalies were predominantly negative, while albedo and SIC largely reflected this transition. However, during the summers of 2017–2020, albedo and SIC anomalies were opposite to those of SIE. The driving factors behind this phenomenon warrant further investigation. Additionally, the trends in the monthly mean anomaly sequences from both albedo products are generally consistent, showing an overall decline in sea ice albedo ( $-0.0002/\text{month}$  for MBRI and  $-0.0006/\text{month}$  for CLARA-A3). The slight difference in values may be attributed to differences in the algorithms used and the methods for handling cloud gaps. These results demonstrate that the MBRI albedo product can be applied to the study of Antarctic environmental change to some extent.

**Figure 11. Monthly anomalies of Antarctic sea ice albedo, SIC, and SIE from 2012 to 2021. Albedo anomalies are derived from (a) the MBRI albedo product and (b) the CLARA-A3 product. Blue bars indicate positive (+) albedo anomalies, while pink bars represent negative (-) albedo anomalies. Blue and pink shaded areas represent months with positive and negative SIE anomalies, respectively. The green solid line denotes monthly SIC anomalies, and the black dashed line represents the albedo trend. R represents the correlation coefficient between albedo and SIC. \*\*\* indicates the p-value less than 0.001.**

Spatially, three Antarctic sea ice albedo maps in the middle of the month were randomly selected for comparison with the CLARA-A3 product to validate the spatial continuity of the MBRI albedo product (Fig. 12). Although the CLARA-A3 albedo product uses a 5-day average, it still exhibits notable data gap due to the cloud

<https://doi.org/10.5194/essd-2025-79>  
Preprint. Discussion started: 9 May 2025  
© Author(s) 2025. CC BY 4.0 License.

Open Access  
Earth System  
Science  
Data  
Discussions



cover. In contrast, the MBRI albedo provides spatially continuous daily albedo data for the sea ice region, with



500 only a few blank strips due to missing raw data. Furthermore, the MBRI albedo product has more sea ice features.  
It can be found that the albedo in the marginal ice zone and along the coastline is generally lower than in stable  
pack ice areas. Then, the maps of both products were zoomed in for a detailed comparison in four regions: King  
Haakon VII Sea (A) in Fig. 12a, the Weddell Sea (B) in Fig. 12b, the Ross Sea (C) and the Prydz Bay (D) in Fig.  
12c.

Kommentiert [A16]: Meaning unclear. Take out?  
Kommentiert [A17]: Redundant.

505 **Figure 12.** Maps of shortwave albedo for the Antarctic sea ice region. (a)-(c) represent the MBRI albedo on December  
15, 2014, February 15, 2016, and October 15, 2021; (d)-(f) show the 5-day averaged CLARA-A3 albedo for the  
corresponding dates. The purple boxes A-D highlight four areas selected for detailed comparison.

Kommentiert [A18]: Add 'For color scale see Fig. 13.'

Figure 13 shows a comparison of the MBRI and CLARA-A3 products in the selected regions. The albedo  
510 spatial distributions of MBRI and CLARA-A3 are highly similar. However, due to its higher spatial resolution, the  
MBRI  
albedo captures finer details. For example, in Fig. 13b1 and Fig. 13c1, the sea ice boundaries in the Weddell Sea  
and along the coastline of the Ross Sea are clearly and accurately defined, with rich texture features such as sea ice  
leads also being captured. In contrast, the CLARA-A3 product presents these features with relatively less clarity. On  
the other hand, the coarser resolution of CLARA-A3 may cause pixels to include more open water areas,  
515 leading to lower pixel values—especially noticeable at the marginal ice zone (e.g., Fig. 13a2, Fig. 13b2, Fig. 13d2).  
Therefore, the MBRI albedo product proposed in this study offers a significant spatial resolution advantage,  
providing more accurate data for research on the Antarctic or regional sea ice radiation budget.



Figure 13. Comparison of shortwave albedo maps in selected regions. (a1)-(d1) show MBRI albedo product maps for the King Haakon VII Sea, Weddell Sea, Ross Sea, and Prydz Bay; (a2)-(d2) show the corresponding CLARA-A3 product maps for these regions.

## 5. Discussion

In this study, we employed a comprehensive methodology to generate an Antarctic sea ice albedo product covering the period from 2012 to 2021. The retrieval process utilized multiple theoretical models and multi-source remote sensing datasets, which not only enabled the MBRI albedo product to achieve high spatiotemporal resolution and improved spatial continuity but also introduced uncertainties caused by various factors. In Section 4.1, we discussed the impact of the uncertainties of the input parameters propagated through the model on the product. The analysis revealed that the retrieval model is particularly sensitive to high view zenith angles, especially in backward-scattering geometries, leading to increased uncertainty. Although such conditions are relatively rare in practical retrievals, the relationship between specific solar/view geometries and sea ice albedo warrants further investigation. Additionally, uncertainties may also be associated with the freeze-melt state of sea ice, with stable sea ice or multi-year ice regions exhibiting lower uncertainties compared to regions with rapidly changing sea ice. Overall, the retrieval process is relatively stable while the uncertainty of cloud reconstruction is greater.

The comparison between the MBRI product and in situ measurements indicates that the product exhibits good



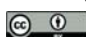

accuracy. The MBRI algorithm effectively utilizes multi-band information from single angle/date observations, achieving daily temporal resolution, which provides a significant advantage. This is important in polar regions where multi-angle observation data are limited. In comparison, the accuracy of APP-x is relatively lower. Given the increasing demands for higher precision in remote sensing products in current research, such accuracy may no

540 longer be satisfactory. The CLARA-A3 product shows good accuracy and can be used for Antarctic sea ice research. To correct for the surface anisotropy of sea ice, it averages the results from different solar/view geometries over five days. However, the sampling directions are insufficient to fully represent the reflection anisotropy of sea ice, which may lead to underestimation (Ding et al., 2022; Qu et al., 2016). Additionally, the five-day averaging significantly reduces the temporal resolution of the product, potentially limiting its ability to capture rapid changes  
 545 in sea ice surface conditions. This limitation is particularly evident when compared to the BUOY 2018R1 dataset, which has fewer observations (Fig. 7I), where the RMSE of CLARA-A3 is relatively large. Furthermore, the CLARA-A3 product does not account for cloud-induced data gaps, resulting in insufficient spatial continuity, which may affect long-term time series analyses.

Based on clear-sky and cloudy-sky dates, we performed a statistical analysis of the albedo for the in situ  
 550 measurement and the MBRI product. The boxplots in Fig. 14 show the distribution of albedo under different sky conditions. The results indicate that, whether for the in situ datasets or the MBRI product, the average albedo under cloudy-sky conditions is significantly higher than under clear-sky conditions (p-values are all less than 0.001). Table 5 quantifies the comparison results for each station. At the BSRN SYO station, the average albedo under cloudy-sky is 0.016 higher than under clear-sky. At other stations, the difference is even larger, ranging from 0.035  
 555 to 0.064, and the significance of this difference is very high. This result aligns with the findings of Key et al. (2001), who concluded that the albedo of snow and ice under cloudy-sky is on average 0.04 to 0.06 higher than under clear-sky. Therefore, when filling cloud-induced data gaps, the cloud forcing effect on sea ice albedo cannot be ignored. Simple interpolation methods may fail to accurately represent the true sea ice albedo under cloudy-sky. This issue may require further improvements in the CLARA-A3 product.



560

**Figure 14.** Boxplots of the in situ measurements and MBRI albedo under cloudy-sky and clear-sky conditions. \*\*\* indicates that the difference between clear-sky albedo and cloudy-sky albedo is significant with a p-value less than 0.001.

**Table 5.** Mean values of in situ measurements and the corresponding MBRI mean albedo at different stations, along with the differences under clear-sky and cloudy-sky conditions.

|                 | BSRN SYO               | MBRI Albedo            | BSRN GVN                | MBRI Albedo            |
|-----------------|------------------------|------------------------|-------------------------|------------------------|
| Clear-sky mean  | 0.786                  | 0.720                  | 0.831                   | 0.807                  |
| Cloudy-sky mean | 0.802                  | 0.784                  | 0.875                   | 0.853                  |
| Difference      | 0.016                  | 0.064                  | 0.044                   | 0.046                  |
| p-value         | $4.34 \times 10^{-5}$  | $4.52 \times 10^{-70}$ | $2.76 \times 10^{-109}$ | $7.38 \times 10^{-65}$ |
|                 | IMAU AWS5              | MBRI Albedo            | IMAU AWS17              | MBRI Albedo            |
| Clear-sky mean  | 0.811                  | 0.848                  | 0.794                   | 0.799                  |
| Cloudy-sky mean | 0.862                  | 0.883                  | 0.848                   | 0.840                  |
| Difference      | 0.051                  | 0.035                  | 0.054                   | 0.041                  |
| p-value         | $1.88 \times 10^{-25}$ | $1.77 \times 10^{-11}$ | $8.71 \times 10^{-30}$  | $5.20 \times 10^{-22}$ |
|                 | Atka Bay AWS2 2012     | MBRI Albedo            | Atka Bay AWS 2013       | MBRI Albedo            |
| Clear-sky mean  | 0.750                  | 0.778                  | 0.800                   | 0.807                  |
| Cloudy-sky mean | 0.797                  | 0.817                  | 0.850                   | 0.854                  |
| Difference      | 0.047                  | 0.039                  | 0.050                   | 0.047                  |
| p-value         | $4.69 \times 10^{-6}$  | $1.67 \times 10^{-4}$  | $7.61 \times 10^{-6}$   | $1.60 \times 10^{-4}$  |

565 **6. Data availability**

The daily 1 km seamless Antarctic sea ice albedo product (Version v2) and the corresponding pixel by pixel

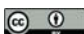

uncertainty can be downloaded at <https://doi.org/10.5281/zenodo.11216156> (Ma et al., 2024) and <https://doi.org/10.5281/zenodo.15067607> (Ma et al., 2025), respectively. These datasets are available from 19 January 2012 to 31 December 2021. These datasets adopt Sinusoidal projection and is gridded using the MODIS Sinusoidal Tile Grid, covering a total of 53 tiles (v14: h06–h29; v15: h09–h26; v16: h11–h17, h21–h24). These datasets are archived in 16-bit integer values GeoTIFF format. The albedo GeoTIFF file contains a single band representing the shortwave clear-sky sea ice albedo, while the uncertainty GeoTIFF file includes a band corresponding to the albedo uncertainty. The data values range from 0 to 10000, with a scaling factor of 0.0001 applied to convert the integer values to their physical representations. Ocean water and land are set to a filling value of -1.

The sea ice albedo files are named “Antarctic\_Sea\_Ice\_Albedo\_yyyyddd\_hv.tif”, with “yyyyddd” denoting the date, “hv” representing the number of the tile. For example, “Antarctic\_Sea\_Ice\_Albedo\_2014270\_h18v15.tif” represents the sea ice albedo data of the h18v15 area on the 270th day of 2014.

The processing codes can be made available upon request to the corresponding author.

## 7. Conclusions

Sea ice albedo is a key factor influencing the polar radiation budget. Currently, commonly used sea ice albedo products are derived from AVHRR data. These products have relatively low spatiotemporal resolution and large data gaps caused by cloud cover. These disadvantages may limit their application in studies of Antarctic sea ice changes. High spatiotemporal resolution and continuity in Antarctic sea ice albedo products are crucial for investigating the mechanisms behind recent anomalies in Antarctic sea ice. Based on the VIIRS reflectance dataset, we generated a daily 1 km Antarctic sea ice albedo product for the period from 2012 to 2021, with reconstruction of cloudy-sky albedo.

The MBRI algorithm has several advantages compared with traditional methods. First, by considering the heterogeneity and anisotropy of sea ice surface and abandoning the Lambertian assumption, it offers a more accurate reflection of the true surface properties. Second, the MBRI algorithm fully utilizes the sensor's single-angle/date observations, allowing inversion at a 1 km resolution, enhancing the spatial and temporal resolution of the product. Last, when filling cloudy pixels, the algorithm considers the cloud forcing effect on sea ice albedo and corrects it using a physical model, rather than relying on simple spatiotemporal interpolation. These improvements are evident from the comprehensive evaluation carried out in comparison with in situ measurements



595 and existing products.

The validation results with in situ datasets indicate that the MBRI albedo product has an overall RMSE of 0.071, a bias of -0.02, and a correlation coefficient of 0.60. Comparisons at different stations show that MBRI consistently outperforms the APP-x and CLARA-A3 products in terms of accuracy. After spatial and temporal aggregation, the RMSE of MBRI product further decreases (below 0.055). Additionally, time series comparisons at four stations demonstrate that MBRI product provides robust temporal continuity, with daily-scale data basically consistent with in situ measurements. Spatial analysis also reveals that the MBRI product offers spatial continuity and rich spatial details. Therefore, the MBRI albedo product has relatively good overall performance.

Uncertainty analysis indicates that the retrieval process of the MBRI clear-sky albedo remains stable across most geographical locations and observation geometries. The annual average sea ice albedo retrieved uncertainty is 0.022. However, for certain specific observation geometries, such as backward observations at high view zenith angle, the model is more sensitive to parameter variations, which could lead to decreased estimation accuracy (with uncertainties exceeding 0.1). Although such situation is rare, it still requires attention in future research, and improvements in the physical model could potentially enhance the computational robustness under this condition. Additionally, by analyzing albedo values under different sky conditions, it was found that sea ice albedo under cloudy-sky is significantly higher than under clear sky (ranging from 0.035 to 0.064), which highlights the necessity of correcting for cloud radiative forcing effects.

In summary, the MBRI albedo product represents the first daily 1 km seamless Antarctic sea ice albedo dataset. Its demonstrated accuracy and spatiotemporal consistency support its application in quantifying the Antarctic radiative budget, evaluating sea ice albedo feedback, and monitoring sea ice spatiotemporal variations. Future improvements are aimed to refining cloudy-sky albedo reconstruction methods, particularly through improved identification of cloudy pixels and the adoption of advanced remote sensing image reconstruction techniques, to further enhance retrieval reliability under cloudy conditions.

#### Author contribution

CM performed the experiments and wrote the manuscript. FL and WH provided the conception of the study and suggestions on the manuscript. QC and FY developed some relevant algorithms. YQ, JY, and HW advised on the experimental code and figure plotting. All authors contributed to the improvement of the manuscript.

#### Competing interests



The contact author has declared that none of the authors has any competing interests.

#### Disclaimer

625 Publisher's note: Copernicus Publications remains neutral with regard to jurisdictional claims in published maps and institutional affiliations.

#### Acknowledgments

We acknowledge Zenodo for publishing our dataset. We acknowledge all the organizations that shared their datasets for use in this study. We are also grateful to the reviewers and editors for their improvements to this paper.

#### 630 Financial support

This work is supported in part by the Fundamental Research Funds for the Central Universities; in part by the National Natural Science Foundation of China (NSFC) under Grant 42171383, Grant 42474056 and Grant 41971287; in part by the National Key Research and Development Program of China under Grant 2017YFA0603104.

#### 635 References

Brandt, R. E., Warren, S. G., Worby, A. P., and Grenfell, T. C.: Surface Albedo of the Antarctic Sea Ice Zone, *J. Clim.*, 18, 3606–3622, <https://doi.org/10.1175/JCLI3489.1>, 2005.

Callaghan, A., De Leeuw, G., Cohen, L., and O'Dowd, C. D.: Relationship of oceanic whitecap coverage to wind speed and wind history, *Geophys. Res. Lett.*, 35, 2008GL036165, <https://doi.org/10.1029/2008GL036165>, 2008.

640 Campagne, P., Crosta, X., Schmidt, S., Noëlle Houssais, M., Ther, O., and Massé, G.: Sedimentary response to sea ice and atmospheric variability over the instrumental period off Adélie Land, East Antarctica, *Biogeosciences*, 13, 4205–4218, <https://doi.org/10.5194/bg-13-4205-2016>, 2016.

Cheng, Q., Hao, W., Ma, C., Ye, F., Luo, J., and Qu, Y.: Daily Arctic Sea-Ice Albedo Retrieval With a Multiband Reflectance Iteration Algorithm, *IEEE Trans. Geosci. Remote Sens.*, 61, 1–12, <https://doi.org/10.1109/TGRS.2023.3323506>, 2023.

Comiso, J. C., Gersten, R. A., Stock, L. V., Turner, J., Perez, G. J., and Cho, K.: Positive Trend in the Antarctic Sea Ice Cover and Associated Changes in Surface Temperature, *J. Clim.*, 30, 2251–2267, <https://doi.org/10.1175/JCLI-D-16-0408.1>, 2017.

Cox, C. and Munk, W.: Measurement of the Roughness of the Sea Surface from Photographs of the Sun's Glitter,



- 650 J. Opt. Soc. Am., 44, 838, <https://doi.org/10.1364/JOSA.44.000838>, 1954.
- Dang, C., Brandt, R. E., and Warren, S. G.: Parameterizations for narrowband and broadband albedo of pure snow and snow containing mineral dust and black carbon, *J. Geophys. Res. Atmospheres*, 120, 5446–5468, <https://doi.org/10.1002/2014JD022646>, 2015.
- 655 Dee, D. P., Uppala, S. M., Simmons, A. J., Berrisford, P., Poli, P., Kobayashi, S., Andrae, U., Balmaseda, M. A., Balsamo, G., Bauer, P., Bechtold, P., Beljaars, A. C. M., Van De Berg, L., Bidlot, J., Bormann, N., Delsol, C., Dragani, R., Fuentes, M., Geer, A. J., Haimberger, L., Healy, S. B., Hersbach, H., Hólm, E. V., Isaksen, I., Kållberg, P., Köhler, M., Matricardi, M., McNally, A. P., Monge-Sanz, B. M., Morcrette, J. -J., Park, B. -K., Peubey, C., De Rosnay, P., Tavolato, C., Thépaut, J. -N., and Vitart, F.: The ERA-Interim reanalysis: configuration and performance of the data assimilation system, *Q. J. R. Meteorol. Soc.*, 137, 553–597, <https://doi.org/10.1002/qj.828>, 2011.
- 660 DiGirolamo, N. E., Parkinson, C. L., Cavalieri, D. J., Gloersen, P., and Zwally, H. J.: Sea Ice Concentrations from Nimbus-7 SMMR and DMSP SSM/I-SSMIS Passive Microwave Data, <https://doi.org/10.5067/MPYG15WAA4WX>, 2022.
- 665 Ding, Y., Qu, Y., Peng, Z., Wang, M., and Li, X.: Estimating Surface Albedo of Arctic Sea Ice Using an Ensemble Back-Propagation Neural Network: Toward a Better Consideration of Reflectance Anisotropy and Melt Ponds, *IEEE Trans. Geosci. Remote Sens.*, 60, 1–17, <https://doi.org/10.1109/TGRS.2022.3202046>, 2022.
- Eayrs, C., Li, X., Raphael, M. N., and Holland, D. M.: Rapid decline in Antarctic sea ice in recent years hints at future change, *Nat. Geosci.*, 14, 460–464, <https://doi.org/10.1038/s41561-021-00768-3>, 2021.
- Eilers, P. H. C.: A Perfect Smoother, *Anal. Chem.*, 75, 3631–3636, <https://doi.org/10.1021/ac034173t>, 2003.
- 670 Feng, Y., Liu, Q., Qu, Y., and Liang, S.: Estimation of the Ocean Water Albedo From Remote Sensing and Meteorological Reanalysis Data, *IEEE Trans. Geosci. Remote Sens.*, 54, 850–868, <https://doi.org/10.1109/TGRS.2015.2468054>, 2016.
- Fetterer, F., Knowles, K., Meier, W. N., Savoie, M. H., and Windnagel, A. K.: Sea Ice Index, Version 3, National Snow and Ice Data Center [data set], <https://doi.org/10.7265/N5K072F8>, 2017.
- 675 Foster, M. J., Phillips, C., Heidinger, A. K., Borbas, E. E., Li, Y., Menzel, W. P., Walther, A., and Weisz, E.: PATMOS-x Version 6.0: 40 Years of Merged AVHRR and HIRS Global Cloud Data, *J. Clim.*, 36, 1143–1160, <https://doi.org/10.1175/JCLI-D-22-0147.1>, 2023.
- 680 Heidinger, A. K., Foster, M. J., Walther, A., and Zhao, X. (Tom): The Pathfinder Atmospheres–Extended AVHRR Climate Dataset, *Bull. Am. Meteorol. Soc.*, 95, 909–922, <https://doi.org/10.1175/BAMS-D-12-00246.1>, 2014.
- Hersbach, H., Bell, B., Berrisford, P., Hirahara, S., Horányi, A., Muñoz-Sabater, J., Nicolas, J., Peubey, C., Radu, R., Schepers, D., Simmons, A., Soci, C., Abdalla, S., Abellan, X., Balsamo, G., Bechtold, P., Biavati, G., Bidlot, J., Bonavita, M., De Chiara, G., Dahlgren, P., Dee, D., Diamantakis, M., Dragani, R., Flemming, J., Forbes, R., Fuentes, M., Geer, A., Haimberger, L., Healy, S., Hogan, R. J., Hólm, E., Janisková, M., Keeley, S., Laloyaux, P.,

<https://doi.org/10.5194/essd-2025-79>  
Preprint. Discussion started: 9 May 2025  
© Author(s) 2025. CC BY 4.0 License.

Open Access  
Earth System  
Science  
Data  
Discussions

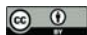

685 Lopez, P., Lupu, C., Radnoti, G., De Rosnay, P., Rozum, I., Vamborg, F., Villaume, S., and Thépaut, J.: The ERA5 global reanalysis, Q. J. R. Meteorol. Soc., 146, 1999–2049, <https://doi.org/10.1002/qj.3803>, 2020.



- Holland, M. M. and Bitz, C. M.: Polar amplification of climate change in coupled models, *Clim. Dyn.*, 21, 221–232, <https://doi.org/10.1007/s00382-003-0332-6>, 2003.
- Hoppmann, M., Nicolaus, M., Paul, S., Hunkeler, P. A., Heinemann, G., Willmes, S., Timmermann, R., Boebel, O., Schmidt, T., Kühnel, M., König-Langlo, G., and Gerdes, R.: Ice platelets below Weddell Sea landfast sea ice, *Ann. Glaciol.*, 56, 175–190, <https://doi.org/10.3189/2015AoG69A678>, 2015a.
- Hoppmann, M., Nicolaus, M., Hunkeler, P. A., Heil, P., Behrens, L. -K., König-Langlo, G., and Gerdes, R.: Seasonal evolution of an ice-shelf influenced fast-ice regime, derived from an autonomous thermistor chain, *J. Geophys. Res. Oceans*, 120, 1703–1724, <https://doi.org/10.1002/2014JC010327>, 2015b.
- Jakobs, C. L., Reijmer, C. H., Smeets, C. J. P. P., Trusel, L. D., Van De Berg, W. J., Van Den Broeke, M. R., and Van Wessem, J. M.: A benchmark dataset of in situ Antarctic surface melt rates and energy balance, *J. Glaciol.*, 66, 291–302, <https://doi.org/10.1017/jog.2020.6>, 2020.
- Jourdier, B.: Evaluation of ERA5, MERRA-2, COSMO-REA6, NEWA and AROME to simulate wind power production over France, *Adv. Sci. Res.*, 17, 63–77, <https://doi.org/10.5194/asr-17-63-2020>, 2020.
- Karlsson, K.-G., Riihelä, A., Trentmann, J., Stengel, M., Solodovnik, I., Meirink, J. F., Devasthale, A., Jääskeläinen, E., Kallio-Myers, V., Eliasson, S., Benas, N., Johansson, E., Stein, D., Finkensieper, S., Håkansson, N., Akkermans, T., Clerbaux, N., Selbach, N., Marc, S., and Hollmann, R.: CLARA-A3: CM SAF cLOUD, Albedo and surface RADIation dataset from AVHRR data - Edition 3 (3.0), [https://doi.org/10.5676/EUM\\_SAF\\_CM/CLARA\\_AVHRR/V003](https://doi.org/10.5676/EUM_SAF_CM/CLARA_AVHRR/V003), 2023a.
- Karlsson, K.-G., Stengel, M., Meirink, J. F., Riihelä, A., Trentmann, J., Akkermans, T., Stein, D., Devasthale, A., Eliasson, S., Johansson, E., Håkansson, N., Solodovnik, I., Benas, N., Clerbaux, N., Selbach, N., Schröder, M., and Hollmann, R.: CLARA-A3: The third edition of the AVHRR-based CM SAF climate data record on clouds, radiation and surface albedo covering the period 1979 to 2023, *Earth Syst. Sci. Data*, 15, 4901–4926, <https://doi.org/10.5194/essd-15-4901-2023>, 2023b.
- Key, J., Wang, X., Liu, Y., Dworak, R., and Letterly, A.: The AVHRR Polar Pathfinder Climate Data Records, *Remote Sens.*, 8, 167, <https://doi.org/10.3390/rs8030167>, 2016.
- Key, J. R., Wang, X., Stoeve, J. C., and Fowler, C.: Estimating the cloudy-sky albedo of sea ice and snow from space, *J. Geophys. Res. Atmospheres*, 106, 12489–12497, <https://doi.org/10.1029/2001JD900069>, 2001.
- Kokhanovsky, A. A. and Zege, E. P.: Scattering optics of snow, *Appl. Opt.*, 43, 1589, <https://doi.org/10.1364/AO.43.001589>, 2004.
- Kokhanovsky, A. A., Aoki, T., Hachikubo, A., Hori, M., and Zege, E. P.: Reflective properties of natural snow: approximate asymptotic theory versus in situ measurements, *IEEE Trans. Geosci. Remote Sens.*, 43, 1529–1535, <https://doi.org/10.1109/TGRS.2005.848414>, 2005.
- König-Langlo, G. and Loose, B.: The Meteorological Observatory at Neumayer Stations (GvN and NM-II) Antarctica, 76, 25–38, 2007.
- Laine, V.: Antarctic ice sheet and sea ice regional albedo and temperature change, 1981–2000, from AVHRR Polar





- Pathfinder data, *Remote Sens. Environ.*, 112, 646–667, <https://doi.org/10.1016/j.rse.2007.06.005>, 2008.
- León-Tavares, J., Gómez-Dans, J., Roujean, J.-L., and Bruniquel, V.: Retrieving land surface reflectance anisotropy with Sentinel-3 observations and prior BRDF model constraints, *Remote Sens. Environ.*, 302, 113967, <https://doi.org/10.1016/j.rse.2023.113967>, 2024.
- Liang, S.: Narrowband to broadband conversions of land surface albedo I Algorithms, *Remote Sens. Environ.*, 2000.
- Liang, S., Zhao, X., Liu, S., Yuan, W., Cheng, X., Xiao, Z., Zhang, X., Liu, Q., Cheng, J., Tang, H., Qu, Y., Bo, Y., Qu, Y., Ren, H., Yu, K., and Townshend, J.: A long-term Global Land Surface Satellite (GLASS) data-set for environmental studies, *Int. J. Digit. Earth*, 6, 5–33, <https://doi.org/10.1080/17538947.2013.805262>, 2013.
- Lindsay, R. W. and Rothrock, D. A.: Arctic Sea Ice Albedo from AVHRR, *J. Clim.*, 7, 1737–1749, [https://doi.org/10.1175/1520-0442\(1994\)007<1737:ASIAFA>2.0.CO;2](https://doi.org/10.1175/1520-0442(1994)007<1737:ASIAFA>2.0.CO;2), 1994.
- Liu, Y., Wang, Z., Sun, Q., Erb, A. M., Li, Z., Schaaf, C. B., Zhang, X., Román, M. O., Scott, R. L., Zhang, Q., Novick, K. A., Syndonia Bret-Harte, M., Petroy, S., and SanClements, M.: Evaluation of the VIIRS BRDF, Albedo and NBAR products suite and an assessment of continuity with the long term MODIS record, *Remote Sens. Environ.*, 201, 256–274, <https://doi.org/10.1016/j.rse.2017.09.020>, 2017.
- Lynch, A. H., Chapman, W. L., Walsh, J. E., and Weller, G.: Development of a Regional Climate Model of the Western Arctic, *J. Clim.*, 8, 1555–1570, [https://doi.org/10.1175/1520-0442\(1995\)008<1555:DOARCM>2.0.CO;2](https://doi.org/10.1175/1520-0442(1995)008<1555:DOARCM>2.0.CO;2), 1995.
- Ma, C., Hao, W., Cheng, Q., Ye, F., Qu, Y., Gao, S., Wu, H., and Li, F.: A daily 1 km seamless Antarctic sea ice albedo product from VIIRS data (Version v2), Zenodo [data set], <https://doi.org/10.5281/zenodo.11216156>, 2024.
- Ma, C., Hao, W., Cheng, Q., Ye, F., Wu, H., and Li, F.: Uncertainty of the daily 1 km seamless Antarctic sea ice albedo product (Version v1), Zenodo [data set], <https://doi.org/10.5281/zenodo.15067607>, 2025.
- Maritorena, S., d'Andon, O. H. F., Mangin, A., and Siegel, D. A.: Merged satellite ocean color data products using a bio-optical model: Characteristics, benefits and issues, *Remote Sens. Environ.*, 114, 1791–1804, <https://doi.org/10.1016/j.rse.2010.04.002>, 2010.
- Mears, C. A., Wentz, F. J., Thorne, P., and Bernie, D.: Assessing uncertainty in estimates of atmospheric temperature changes from MSU and AMSU using a Monte-Carlo estimation technique, *J. Geophys. Res.*, 116, D08112, <https://doi.org/10.1029/2010JD014954>, 2011.
- Melshimer, C.: ASI Version 5 Sea Ice Concentration User Guide, 2019.
- Morel, A., Antoine, D., and Gentili, B.: Bidirectional reflectance of oceanic waters: accounting for Raman emission and varying particle scattering phase function, *Appl. Opt.*, 41, 6289, <https://doi.org/10.1364/AO.41.006289>, 2002.
- Nicolaus, M., Arndt, S., Katlein, C.: Albedo measurements from radiation station 2018R1 [dataset]. Alfred Wegener Institute, Helmholtz Centre for Polar and Marine Research, Bremerhaven, PANGAEA, <https://doi.org/10.1594/PANGAEA.949507>, 2024.



- Parkinson, C. L. and Washington, W. M.: A large-scale numerical model of sea ice, *J. Geophys. Res. Oceans*, 84, 311–337, <https://doi.org/10.1029/JC084iC01p00311>, 1979.
- 760 Pinty, B., Lattanzio, A., Martonchik, J. V., Verstraete, M. M., Gobron, N., Taberner, M., Widlowski, J.-L., Dickinson, R. E., and Govaerts, Y.: Coupling Diffuse Sky Radiation and Surface Albedo, *J. Atmospheric Sci.*, 62, 2580–2591, <https://doi.org/10.1175/JAS3479.1>, 2005.
- Qu, Y., Liang, S., Liu, Q., He, T., Liu, S., and Li, X.: Mapping Surface Broadband Albedo from Satellite Observations: A Review of Literatures on Algorithms and Products, *Remote Sens.*, 7, 990–1020, <https://doi.org/10.3390/rs70100990>, 2015.
- 765 Qu, Y., Liang, S., Liu, Q., Li, X., Feng, Y., and Liu, S.: Estimating Arctic sea-ice shortwave albedo from MODIS data, *Remote Sens. Environ.*, 186, 32–46, <https://doi.org/10.1016/j.rse.2016.08.015>, 2016.
- Riihelä, A., Manninen, T., Laine, V., Andersson, K., and Kaspar, F.: CLARA-SAL: a global 28 yr timeseries of Earth's black-sky surface albedo, *Atmospheric Chem. Phys.*, 13, 3743–3762, <https://doi.org/10.5194/acp-13-3743-2013>, 2013.
- 770 Riihelä, A., Bright, R. M., and Anttila, K.: Recent strengthening of snow and ice albedo feedback driven by Antarctic sea-ice loss, *Nat. Geosci.*, 14, 832–836, <https://doi.org/10.1038/s41561-021-00841-x>, 2021.
- Ross, B. and Walsh, J. E.: A comparison of simulated and observed fluctuations in summertime Arctic surface albedo, *J. Geophys. Res. Oceans*, 92, 13115–13125, <https://doi.org/10.1029/JC092iC12p13115>, 1987.
- 775 Saulquin, B., Gohin, F., and Fanton d'Andon, O.: Interpolated fields of satellite-derived multi-algorithm chlorophyll-a estimates at global and European scales in the frame of the European Copernicus-Marine Environment Monitoring Service, *J. Oper. Oceanogr.*, 12, 47–57, <https://doi.org/10.1080/1755876X.2018.1552358>, 2019.
- Schaepman-Strub, G., Schaepman, M. E., Painter, T. H., Dangel, S., and Martonchik, J. V.: Reflectance quantities in optical remote sensing—definitions and case studies, *Remote Sens. Environ.*, 103, 27–42, <https://doi.org/10.1016/j.rse.2006.03.002>, 2006.
- 780
- Schramm, J. L., Holland, M. M., Curry, J. A., and Ebert, E. E.: Modeling the thermodynamics of a sea ice thickness distribution: 1. Sensitivity to ice thickness resolution, *J. Geophys. Res. Oceans*, 102, 23079–23091, <https://doi.org/10.1029/97JC01297>, 1997.
- 785 Stapf, J., Ehrlich, A., Jäkel, E., Lüpkes, C., and Wendisch, M.: Reassessment of shortwave surface cloud radiative forcing in the Arctic: consideration of surface-albedo–cloud interactions, *Atmospheric Chem. Phys.*, 20, 9895–9914, <https://doi.org/10.5194/acp-20-9895-2020>, 2020.
- Stroeve, J., Box, J. E., Gao, F., Liang, S., Nolin, A., and Schaaf, C.: Accuracy assessment of the MODIS 16-day albedo product for snow: comparisons with Greenland in situ measurements, *Remote Sens. Environ.*, 94, 46–60, <https://doi.org/10.1016/j.rse.2004.09.001>, 2005.
- 790 Tanaka, Y.: Horizon at station Syowa (2020-03) [dataset]. Japan Meteorological Agency, Tokyo, PANGAEA, 42



- https://doi.org/10.1594/PANGAEA.948521, 2022.
- Walther, A. and Heidinger, A. K.: Implementation of the Daytime Cloud Optical and Microphysical Properties Algorithm (DCOMP) in PATMOS-x, *Journal of Applied Meteorology and Climatology*, 51, 1371–1390, https://doi.org/10.1175/JAMC-D-11-0108.1, 2012.
- Wang, L., Zuo, B., Le, Y., Chen, Y., and Li, J.: Penetrating remote sensing: Next-generation remote sensing for transparent earth, *The Innovation*, 4, 100519, https://doi.org/10.1016/j.xinn.2023.100519, 2023.
- Wang, X. and Key, J. R.: Arctic Surface, Cloud, and Radiation Properties Based on the AVHRR Polar Pathfinder Dataset. Part I: Spatial and Temporal Characteristics, *J. Clim.*, 18, 2558–2574, https://doi.org/10.1175/JCLI3438.1, 2005.
- Warren, S. G. and Brandt, R. E.: Optical constants of ice from the ultraviolet to the microwave: A revised compilation, *J. Geophys. Res. Atmospheres*, 113, 2007JD009744, https://doi.org/10.1029/2007JD009744, 2008.
- Winkelmann, R., Levermann, A., Martin, M. A., and Frieler, K.: Increased future ice discharge from Antarctica owing to higher snowfall, *Nature*, 492, 239–242, https://doi.org/10.1038/nature11616, 2012.
- Winkler, J. R.: Numerical recipes in C: The art of scientific computing, second edition, *Endeavour*, 17, 201, https://doi.org/10.1016/0160-9327(93)90069-F, 1993.
- Xiong, X., Stamnes, K., and Lubin, D.: Surface Albedo over the Arctic Ocean Derived from AVHRR and Its Validation with SHEBA Data, *J. Appl. Meteorol.*, 41, 413–425, https://doi.org/10.1175/1520-0450(2002)041<0413:SAOTAO>2.0.CO;2, 2002.
- Yang, Y., Marshak, A., Han, M., Palm, S. P., and Harding, D. J.: Snow grain size retrieval over the polar ice sheets with the Ice, Cloud, and land Elevation Satellite (ICESat) observations, *J. Quant. Spectrosc. Radiat. Transf.*, 188, 159–164, https://doi.org/10.1016/j.jqsrt.2016.03.033, 2017.
- Ye, F., Cheng, Q., Hao, W., Yu, D., Ma, C., Liang, D., and Shen, H.: Reconstructing daily snow and ice albedo series for Greenland by coupling spatiotemporal and physics-informed models, *Int. J. Appl. Earth Obs. Geoinformation*, 124, 103519, https://doi.org/10.1016/j.jag.2023.103519, 2023.
- Yuan, N., Ding, M., Ludescher, J., and Bunde, A.: Increase of the Antarctic Sea Ice Extent is highly significant only in the Ross Sea, *Sci. Rep.*, 7, 41096, https://doi.org/10.1038/srep41096, 2017.
- Zege, E., Malinka, A., Katsev, I., Prikhach, A., Heygster, G., Istomina, L., Birnbaum, G., and Schwarz, P.: Algorithm to retrieve the melt pond fraction and the spectral albedo of Arctic summer ice from satellite optical data, *Remote Sens. Environ.*, 163, 153–164, https://doi.org/10.1016/j.rse.2015.03.012, 2015.
- Zege, E. P., Katsev, I. L., Malinka, A. V., Prikhach, A. S., Heygster, G., and Wiebe, H.: Algorithm for retrieval of the effective snow grain size and pollution amount from satellite measurements, *Remote Sens. Environ.*, 115, 2674–2685, https://doi.org/10.1016/j.rse.2011.06.001, 2011.
- Zhang, L., Delworth, T. L., Yang, X., Zeng, F., Lu, F., Morioka, Y., and Bushuk, M.: The relative role of the

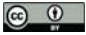

s a ice extent anomalies in 2016–2021, Commun. Earth  
u  
b  
s  
u  
r  
f  
a  
c  
e  
S  
o  
u  
t  
h  
e  
r  
n  
O  
c  
e  
a  
n  
i  
n  
d  
r  
i  
v  
i  
n  
g  
n  
e  
g  
a  
t  
i  
v  
e  
A  
n  
t  
a  
r  
c  
t  
i  
c  
S  
e

<https://doi.org/10.5194/essd-2025-79>  
Preprint. Discussion started: 9 May 2025  
© Author(s) 2025. CC BY 4.0 License.

Open Access  
Earth System  
Science  
Data  
Discussions



Environ., 3, 302, <https://doi.org/10.1038/s43247-022-00624-1>, 2022.

Zhou, L., Xu, S., Liu, J., and Wang, B.: On the retrieval of sea ice thickness and snow depth using concurrent laser altimetry and L-band remote sensing data, *The Cryosphere*, 12, 993–1012, <https://doi.org/10.5194/tc-12-993-2018>, 830 2018.

Zhou, Y., Li, W., Chen, N., Fan, Y., and Stamnes, K.: A sensor-agnostic albedo retrieval method for realistic sea ice surfaces: model and validation, *The Cryosphere*, 17, 1053–1087, <https://doi.org/10.5194/tc-17-1053-2023>, 2023.
